# Supplementary material
Source: Research Square preprint supplement (doi:10.21203/rs.3.rs-9748525/v1)
Supplement: Supplementary file 1 [file 0d5b7f3205be703cb4b4da79.docx]

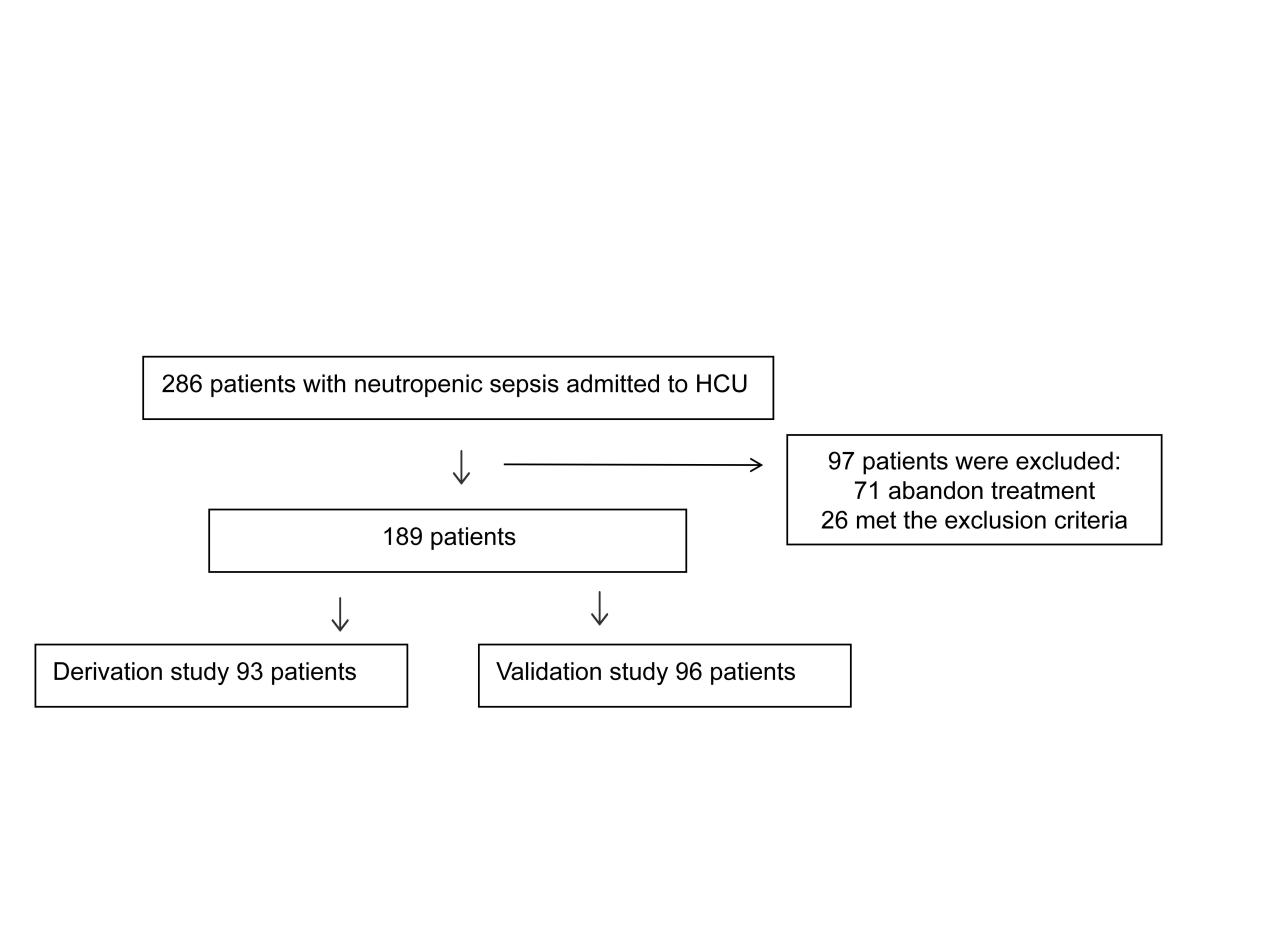


**Figures S1.** Flow diagram illustrating selection of patients.


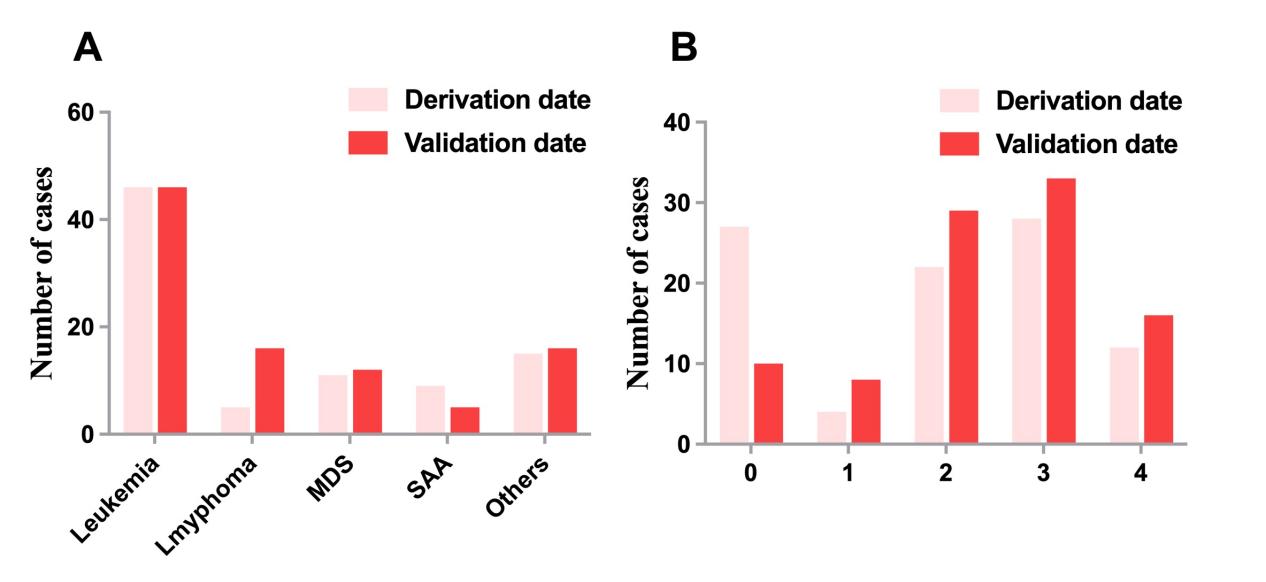


**Figures S2.** Distribution of the illness source (A) and prognosis score (B) in the derivation and validation samples

Abbreviations: MDS, [myelodysplastic syndrome](javascript:;); SAA, severe aplastic anemia
